# Supplementary material for: Treating octasilanol [Si8O12][OH]8 with tetramethoxysilane and trimethoxyvinylsilane: a halogen-free synthetic route to alkoxysilyl-substituted double-four-ring siloxanes
Source: Royal Society of Chemistry journal article supplement (doi:10.1039/d0dt04265j), 2021-01-01
Supplement: d0dt04265j1.pdf [file d0dt04265j1.pdf]

## Supporting Information

### **Treating Octasilanol [Si<sub>8</sub>O<sub>12</sub>][OH]<sub>8</sub> with Tetramethoxysilane and Trimethoxyvinylsilane: A Halogen-free Synthetic Route to Alkoxysilyl-substituted Double-four-ring Siloxanes**

Takeshi Nozawa, Toshiaki Kobayashi, Tomohiro Matsumoto, Fujio Yagihashi,

Kazuhiko Sato, and Masayasu Igarashi\*

E-mail: masayasu-igarashi@aist.go.jp

*Interdisciplinary Research Center for Catalytic Chemistry, National Institute of Advanced Industrial Science and Technology (AIST), 1-1-1 Higashi, Tsukuba, Ibaraki 305-8565, Japan*

### **Table of Contents**

|                                                                                                                                       |       |
|---------------------------------------------------------------------------------------------------------------------------------------|-------|
| 1. General Information                                                                                                                | S2    |
| 2. Experimental Details                                                                                                               | S2-S6 |
| 3. Single-crystal X-ray diffraction analysis of [Si <sub>8</sub> O <sub>12</sub> ][OSi(OMe) <sub>3</sub> ] <sub>8</sub> ( <b>4a</b> ) | S7-S8 |
| 4. References                                                                                                                         | S8    |

### **1. General Information**

$^1\text{H}$  NMR (600 MHz),  $^{13}\text{C}$  NMR (150 MHz), and  $^{29}\text{Si}$  NMR (119 MHz) spectra were recorded at room temperature on a Bruker AVANCE III spectrometer. Chemical shifts ( $\delta$ ) are reported in parts per million (ppm) relative to an internal standard [ $\text{Me}_3\text{Si}-\text{C}_6\text{H}_5$ : 0.24 ppm ( $^1\text{H}$  NMR) and  $-1.1$  ppm ( $^{13}\text{C}$  NMR),  $-4.0$  ppm ( $^{29}\text{Si}$  NMR) for **4a,b** in  $\text{CD}_3\text{CN}$  (Figures S1-S6); 0.27 ppm ( $^1\text{H}$  NMR),  $-1.2$  ppm ( $^{13}\text{C}$  NMR), and  $-4.2$  ppm ( $^{29}\text{Si}$  NMR) for analysis of the reaction mixture in  $\text{DMF}-d_7$  (Figures 1, S7)]. High-resolution time-of-flight (TOF) mass spectra (electrospray-ionization (ESI)) were recorded on a Bruker micrOTOF II spectrometer operating in negative-ion mode.

All manipulations were performed under an argon atmosphere using Schlenk-line techniques or an argon-filled glove box.  $[\text{Si}_8\text{O}_{12}][\text{OH}]_8$  was prepared by our previously reported method.<sup>1</sup> QuadraPure™ EDA was obtained from Aldrich Chemical Co. Tetramethoxysilane, trimethoxyvinylsilane, and trimethylphenylsilane were obtained from Tokyo Chemical Industry Co., Ltd. Tetramethoxysilane and trimethoxyvinylsilane were distilled before use. *N,N*-dimethylformamide (DMF; super dehydrated grade), hexane (super dehydrated grade), and conc. sulfuric acid (>95%) were obtained from FUJIFILM Wako Pure Chemical Co. Amberlyst™ 15 (JS-HG·DRY) was obtained from ORGANO Co.

## 2. Experimental Details

**$\text{H}_2\text{SO}_4$ -catalyzed synthesis of  $[\text{Si}_8\text{O}_{12}][\text{OSi}(\text{OMe})_3]_8$  (**4a**).** In a vial equipped with a magnetic stirring bar,  $[\text{Si}_8\text{O}_{12}][\text{OH}]_8$ (**3**)·11.46DMAc (29.0 mg, 0.0200 mmol) and tetramethoxysilane (100.1 mg, 0.658 mmol) were dissolved in DMF (0.3 mL). To the mixture, a DMF (0.1 mL) solution of  $\text{H}_2\text{SO}_4$  (0.0020 mmol, 1.25 mol% based on the amount of SiOH moieties in **3**) was added. After stirring at room temperature for 24 h, Quadra Pure™ EDA (5.0 mg, 4-8 eq. for  $\text{H}_2\text{SO}_4$ ) was added and stirring was continued at room temperature for 5 min. Then, the reaction mixture was filtered to remove the Quadra Pure™ EDA, before the solvent was removed from the filtrate *in vacuo*. The thus obtained solid was decanted with hexane to afford **4a** as a colorless solid (22.5 mg, 74.3%).

$[\text{Si}_8\text{O}_{12}][\text{OSi}(\text{OMe})_3]_8$ .  $^1\text{H}$  NMR (600 MHz,  $\text{CD}_3\text{CN}$ ): 3.55 (s, 72H,  $\text{OCH}_3$ );  $^{13}\text{C}$  NMR (150 MHz,  $\text{CD}_3\text{CN}$ ): 51.7 (*OMe*);  $^{29}\text{Si}$  NMR (119 MHz,  $\text{CD}_3\text{CN}$ ):  $-86.0$  (SiOSiOMe),  $-110.3$  (SiOSiOMe); HRMS (ESI): *m/z* calcd. for  $\text{C}_{24}\text{H}_{76}\text{NO}_{44}\text{Si}_{16}^+$  1530.0043 [ $\text{M}+\text{NH}_4$ ]<sup>+</sup>, found 1530.0038.

**Amberlyst™ 15-catalyzed synthesis of  $[\text{Si}_8\text{O}_{12}][\text{OSi}(\text{OMe})_3]_8$  (**4a**).** In a Schlenk tube equipped with a magnetic stirring bar,  $[\text{Si}_8\text{O}_{12}][\text{OH}]_8$ (**3**)·11.46DMAc (29.0 mg, 0.0200 mmol), tetramethoxysilane (98.7 mg, 0.648 mmol), and Amberlyst™ 15 (JS-HG·DRY) (5.2 mg, 0.024 mmol, 15 mol% based on the amount of SiOH moieties in **3**) were added to DMF (0.5 mL). After stirring at 60 °C for 24 h, Amberlyst™ 15 was separated from the reaction mixture by filtration, and the solvent was removed from the filtrate *in vacuo*. The thus obtained solid was decanted with hexane to afford **4a** as a colorless solid (27.8 mg, 91.8%).

**Synthesis of  $[\text{Si}_8\text{O}_{12}][\text{OSiVi}(\text{OMe})_2]_8$  (**4b**).** In a Schlenk tube equipped with a magnetic stirring bar,  $[\text{Si}_8\text{O}_{12}][\text{OH}]_8$ (**3**)·11.46DMAc (29.0 mg, 0.0200 mmol), trimethoxyvinylsilane (95.2 mg, 0.642 mmol), and Amberlyst™ 15 (JS-HG·DRY) (5.0 mg, 0.023 mmol, 14 mol% based on the amount of SiOH moieties in **3**) were added to DMF (0.5 mL). After stirring at 60 °C for 24 h, Amberlyst™ 15 was separated from the reaction mixture by filtration, and the solvent was removed from the filtrate *in vacuo*. The thus obtained solid was decanted with hexane to afford **4b** as a colorless solid (17.6 mg, 59.4%).

$[\text{Si}_8\text{O}_{12}][\text{OSiVi}(\text{OMe})_2]_8$ .  $^1\text{H}$  NMR (600 MHz,  $\text{CD}_3\text{CN}$ ): 3.52 (s, 48H,  $\text{OCH}_3$ ), 5.88 (dd, 8H,  $^3J = 19.0$ , 13.5 Hz,  $\text{CH}=\text{CH}_2$ ), 6.01 (d, 8H,  $^3J = 19.0$  Hz,  $\text{CH}=\text{CH}_2$ ), 6.15 (d, 8H,  $^3J = 13.5$  Hz,  $\text{CH}=\text{CH}_2$ );  $^{13}\text{C}$  NMR (150 MHz,  $\text{CD}_3\text{CN}$ ): 51.0 (*OMe*), 128.9 ( $\text{SiCH}=\text{CH}_2$ ), 138.6 ( $\text{SiCH}=\text{CH}_2$ );  $^{29}\text{Si}$  NMR (119 MHz,  $\text{CD}_3\text{CN}$ ): -63.1 ( $\text{SiOSiVi}(\text{OMe})_2$ ), -110.2 ( $\text{SiOSiVi}(\text{OMe})_2$ ); HRMS (ESI): *m/z* calcd. for  $\text{C}_{32}\text{H}_{72}\text{O}_{36}\text{Si}_{16}\text{Na}^+$  1503.0004  $[\text{M}+\text{Na}]^+$ , found 1502.9990.

#### NMR spectra of **4a** and **4b**

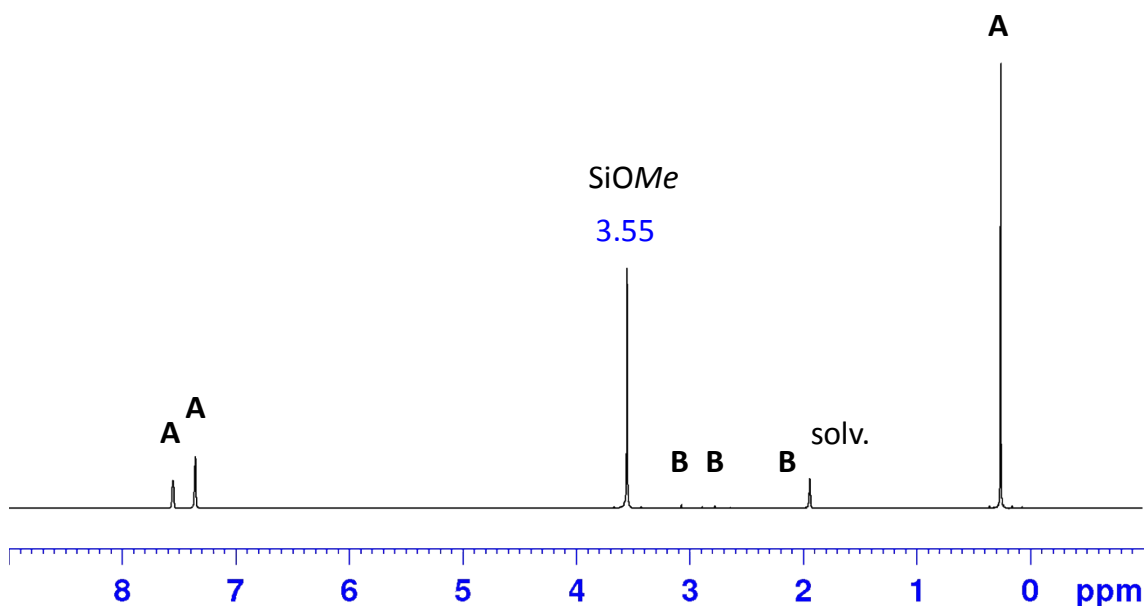

**Figure S1.**  $^1\text{H}$  NMR spectrum of  $[\text{Si}_8\text{O}_{12}][\text{OSi}(\text{OMe})_3]_8$  (**4a**) in  $\text{CD}_3\text{CN}$ . **A**: signals corresponding to the internal standard trimethylsilylbenzene; **B**: signals corresponding to *N,N*-dimethylacetamide (DMAc).

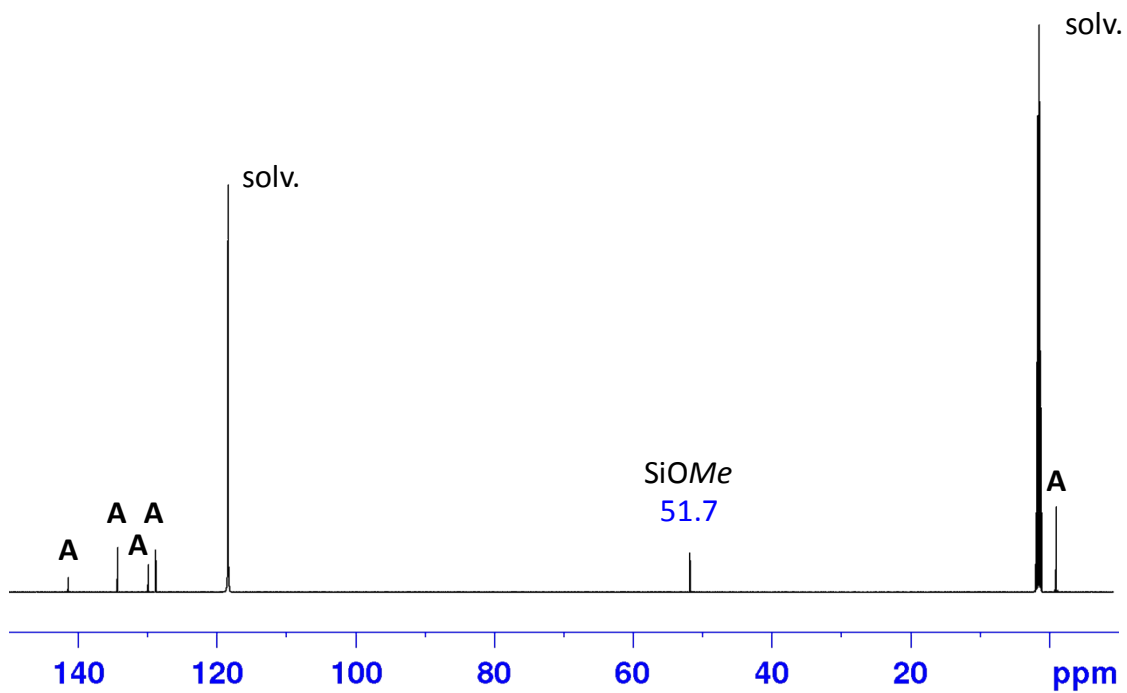

**Figure S2.**  $^{13}\text{C}$  NMR spectrum of  $[\text{Si}_8\text{O}_{12}][\text{OSi}(\text{OMe})_3]_8$  (**4a**) in  $\text{CD}_3\text{CN}$ . A: signals corresponding to the internal standard trimethylsilylbenzene.

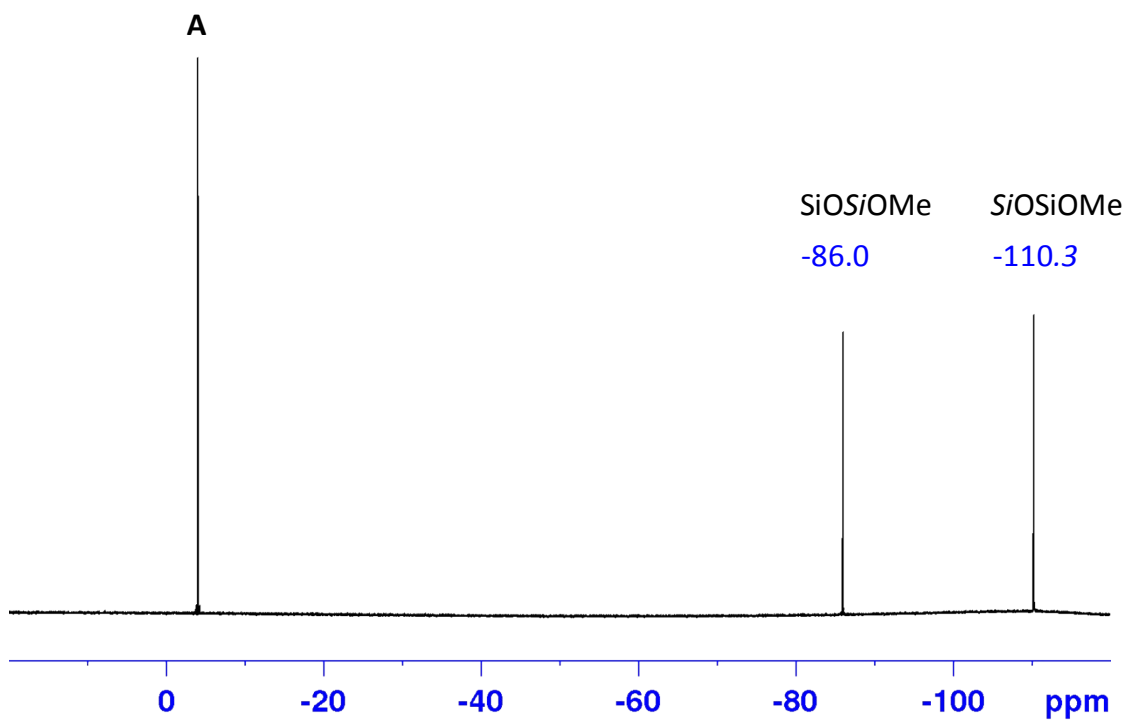

**Figure S3.**  $^{29}\text{Si}$  NMR spectrum of  $[\text{Si}_8\text{O}_{12}][\text{OSi}(\text{OMe})_3]_8$  (**4a**) in  $\text{CD}_3\text{CN}$ . A: signals corresponding to the internal standard trimethylsilylbenzene.

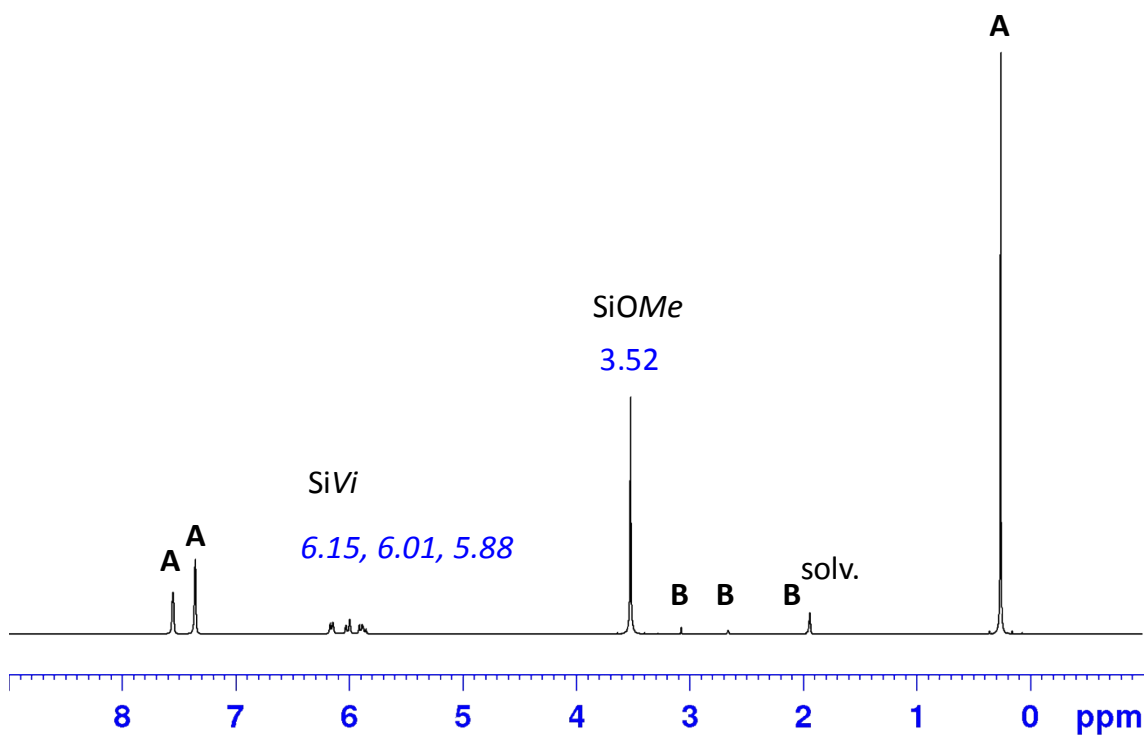

**Figure S4.**  $^1\text{H}$  NMR spectrum of  $[\text{Si}_8\text{O}_{12}][\text{OSiVi}(\text{OMe})_2]_8$  (**4b**) in  $\text{CD}_3\text{CN}$ . A: signals corresponding to the internal standard trimethylsilylbenzene; B: signals corresponding to DMAc.

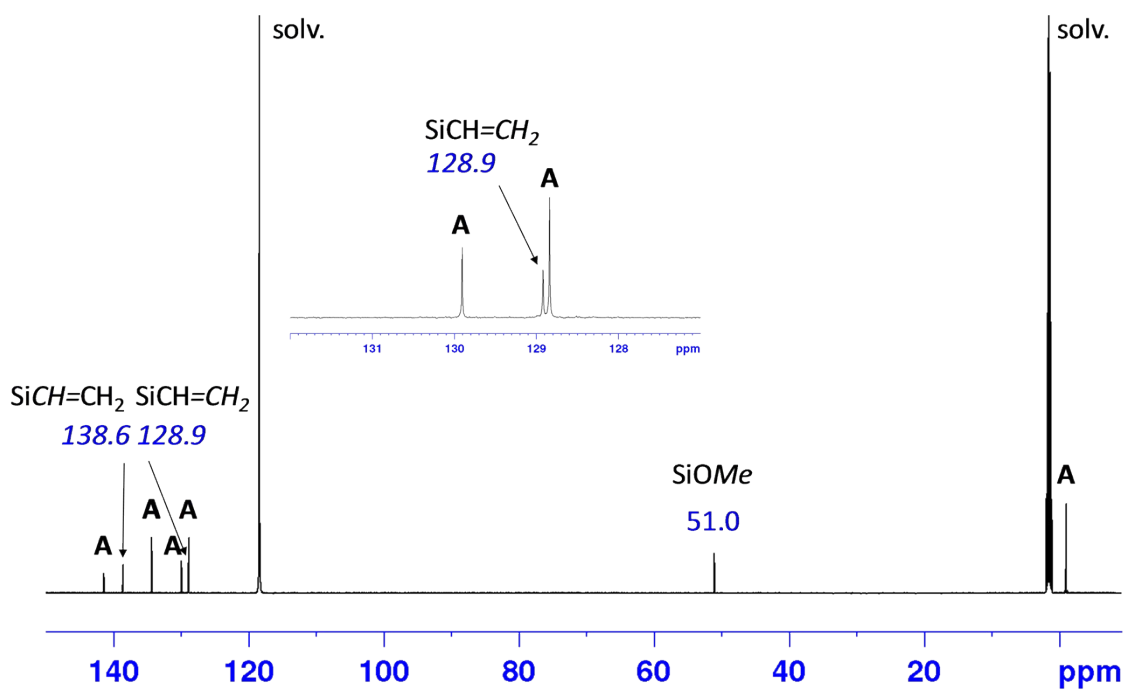

**Figure S5.**  $^{13}\text{C}$  NMR spectrum of  $[\text{Si}_8\text{O}_{12}][\text{OSiVi}(\text{OMe})_2]_8$  (**4b**) in  $\text{CD}_3\text{CN}$ . A: signals corresponding to the internal standard trimethylsilylbenzene. Inset: magnification of the 127-132 ppm region.

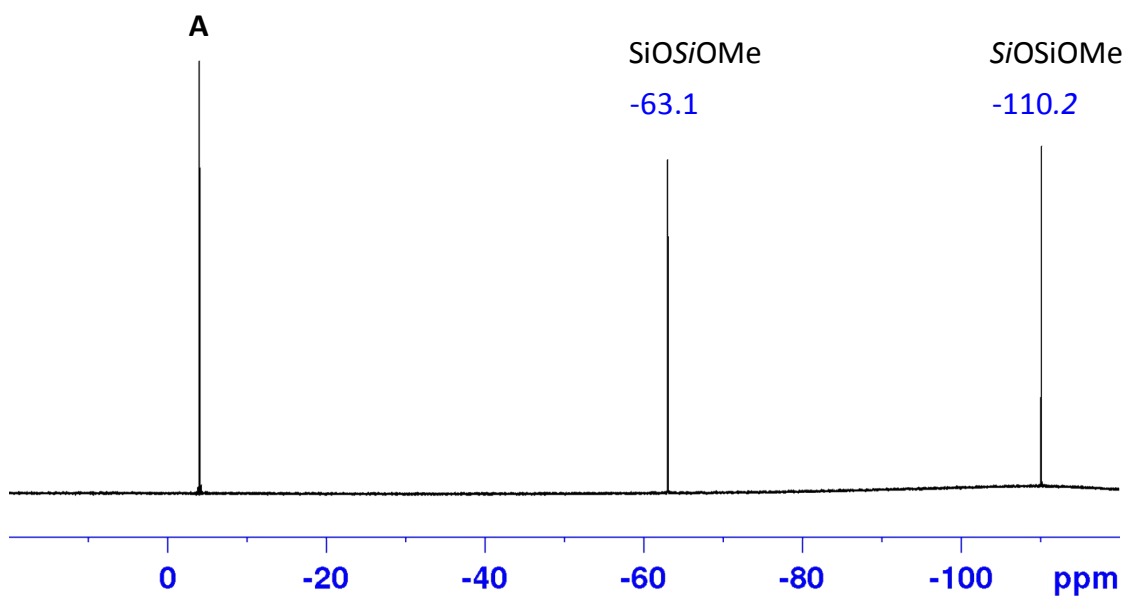

**Figure S6.**  $^{29}\text{Si}$  NMR spectrum of  $[\text{Si}_8\text{O}_{12}][\text{OSiVi}(\text{OMe})_2]_8$  (**4b**) in  $\text{CD}_3\text{CN}$ . A: signals corresponding to the internal standard trimethylsilylbenzene.

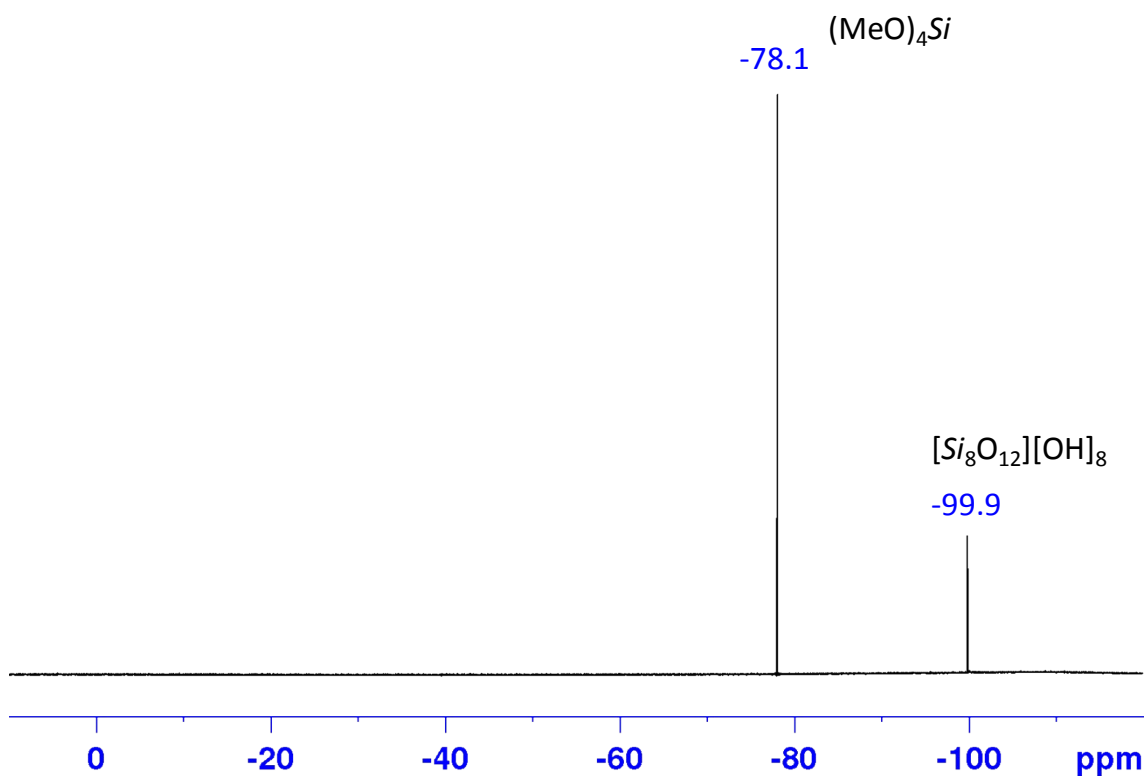

**Figure S7.**  $^{29}\text{Si}$  NMR spectrum of the mixture of silanol  $[\text{Si}_8\text{O}_{12}][\text{OH}]_8$  (**3**) (0.02 mmol) and tetramethoxysilane (0.66 mmol) without an acidic catalyst in  $\text{DMF-}d_7$  (after stirring for 24 h at RT). The starting materials remained unreacted.

### 3. Single-crystal X-ray diffraction analysis of $[\text{Si}_8\text{O}_{12}][\text{OSi}(\text{OMe})_3]_8$ (**4a**)

Alkoxysilane **4a** (509 mg, 0.336 mmol) was dissolved in a mixture of toluene (1.5 mL) and hexane (0.5 mL). Keeping the solution at  $-30\text{ }^\circ\text{C}$  for one day afforded single crystals of **4a**. X-ray diffraction data for **4a** were collected on a Rigaku XtaLAB P200 diffractometer with a Pilatus 200K detector using multi-layer mirror monochromatic Mo K $\alpha$  radiation ( $\lambda = 0.71075\text{ \AA}$ ) under a stream of  $\text{N}_2$  at 93 K. A thermal ellipsoid plot is shown in Figure 2, and the crystal data and structure-refinement parameters are listed in Table S1.

Data collection, cell refinement, and data reduction were conducted using the CrystalClear-SM Expert 2.0 software.<sup>[2]</sup> The structure was solved by direct methods using the program SHELXT-2015<sup>[3]</sup> and refined by full-matrix least-squares methods on  $F^2$  using SHELXL-2015.<sup>[4]</sup> All materials for publication were prepared using the Olex2 software.<sup>[5]</sup> All non-hydrogen atoms were refined anisotropically. The H atoms were calculated geometrically and refined in riding mode using  $U_{\text{iso}}(\text{H})$  values of  $1.5U_{\text{eq}}(\text{C})$ .

**Table S1.** Crystal data and structure refinement parameters for **4a**

|                                 |                                                                    |                           |
|---------------------------------|--------------------------------------------------------------------|---------------------------|
| Moiety formula                  | $\text{C}_{24}\text{H}_{72}\text{O}_{44}\text{Si}_{16}$            |                           |
| Sum formula                     | $\text{C}_{24}\text{H}_{72}\text{O}_{44}\text{Si}_{16}$            |                           |
| Formula weight                  | 1514.25                                                            |                           |
| Temperature                     | 93 K                                                               |                           |
| Wavelength                      | 0.71075 $\text{\AA}$                                               |                           |
| Crystal system                  | Monoclinic                                                         |                           |
| Space group                     | $Cc$                                                               |                           |
| Unit cell dimensions            | $a = 14.713(3)\text{ \AA}$                                         | $\alpha = 90^\circ$       |
|                                 | $b = 16.575(4)\text{ \AA}$                                         | $\beta = 90.201(5)^\circ$ |
|                                 | $c = 26.663(6)\text{ \AA}$                                         | $\gamma = 90^\circ$       |
| Volume                          | $6503(2)\text{ \AA}^3$                                             |                           |
| Z                               | 4                                                                  |                           |
| Density (calculated)            | $1.547\text{ Mg/m}^3$                                              |                           |
| Absorption coefficient          | $0.413\text{ mm}^{-1}$                                             |                           |
| $F(000)$                        | 3168                                                               |                           |
| Crystal size                    | $0.23 \times 0.14 \times 0.04\text{ mm}^3$                         |                           |
| Theta range for data collection | $3.056$ to $27.478^\circ$                                          |                           |
| Index ranges                    | $-19 \leq h \leq 18$ , $-21 \leq k \leq 21$ , $-34 \leq l \leq 34$ |                           |
| Reflections collected           | 40200                                                              |                           |
| Independent reflections         | 14534 [ $R(\text{int}) = 0.1161$ ]                                 |                           |

|                                         |                                              |
|-----------------------------------------|----------------------------------------------|
| Completeness to $\theta = 25.242^\circ$ | 99.7%                                        |
| Refinement method                       | Full-matrix least-squares on $F^2$           |
| Data / restraints / parameters          | 14534 / 2 / 808                              |
| Goodness-of-fit on $F^2$                | 0.967                                        |
| Final $R$ indices [ $I > 2\sigma(I)$ ]  | $R_1 = 0.0659$ , $wR_2 = 0.1520$             |
| $R$ indices (all data)                  | $R_1 = 0.0965$ , $wR_2 = 0.1664$             |
| Largest diff. peak and hole             | 0.903 and $-0.514 \text{ e.}\text{\AA}^{-3}$ |

---

#### 4. References

- 1 T. Nozawa, T. Matsumoto, F. Yagihashi, T. Beppu, K. Sato, M. Igarashi, *Chem. Lett.* 2018, **47**, 1530-1533.
- 2 *CrystalClear-SM Expert*: Rigaku Corporation, Tokyo, Japan, 2011.
- 3 *SHELXT-2015*: G. M. Sheldrick, Program for the Solution of Crystal Structures; *Acta Crystallogr. A* 2015, **71**, 3–8.
- 4 *SHELXL-2015*: G. M. Sheldrick, Program for the Refinement of Crystal Structures; *Acta Crystallogr. C* 2015, **71**, 3–8.
- 5 O. V. Dolomanov, L. J. Bourhis, R.J. Gildea, J.A.K. Howard, H. Puschmann, *OLEX2: A complete structure solution, refinement and analysis program. J. Appl. Cryst.* 2009, **42**, 339-341.
